# Supplementary material for: GRK2 moderates the acute mitochondrial damage to ionizing radiation exposure by promoting mitochondrial fission/fusion
Source: PubMed Central journal article supplement (PMC5841414; doi:10.1038/s41420-018-0028-7), 2018-02-14
Supplement: 41420_2018_28_MOESM1_ESM.pdf [file 41420_2018_28_MOESM1_ESM.pdf]

## Supplemental Figure 1

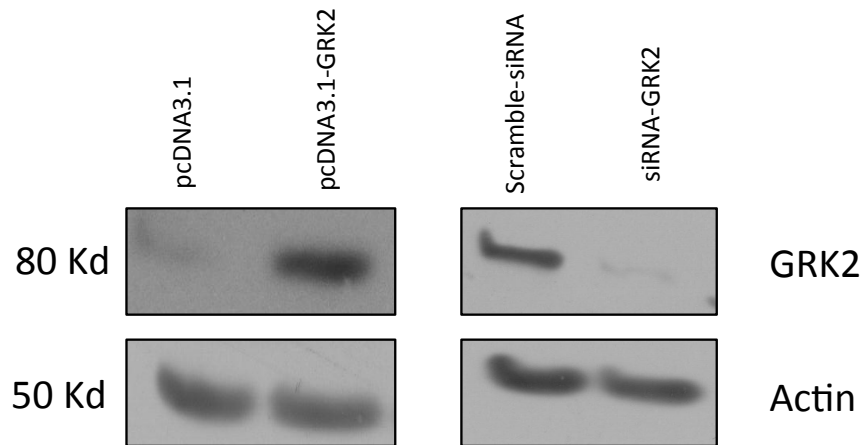

Western Blot performed on the whole lysate of HEK293 cells transfected with pcDNA3.1 or siRNA-GRK2. Representative image showing GRK2 overexpression and silencing.
